# Supplementary material for: Lanostane Triterpenoids and Ergostane Steroids from Ganoderma luteomarginatum and Their Cytotoxicity
Source: MDPI journal article supplement (doi:10.3390/molecules27206989), 2022-10-18
Supplement: s1 [file s1]

## Supporting Information

# Lanostane Triterpenoids and Ergostane Steroids from *Ganoderma luteomarginatum* and Their Cytotoxicity

Qingyun Ma <sup>1,†</sup>, Shuangshuang Zhang <sup>2,†</sup>, Li Yang <sup>1</sup>, Qingyi Xie <sup>1</sup>, Haofu Dai <sup>1</sup>, Zhifang Yu <sup>3,\*</sup> and Youxing Zhao <sup>1,\*</sup>

<sup>1</sup> Haikou Key Laboratory for Research and Utilization of Tropical Natural Products, Institute of Tropical Bioscience and Biotechnology, Chinese Academy of Tropical Agricultural Sciences & Hainan Key Laboratory for Protection and Utilization of Tropical Bioresources, Hainan Academy of Tropical Agricultural Resource, Haikou 571101, China

<sup>2</sup> Jiangsu Food&Pharmaceutical Science College, Huaian 223003, China

<sup>3</sup> College of Food Science and Technology, Nanjing Agricultural University, Nanjing 210095, China

\* Correspondence: yuzhifang@njau.edu.cn (Z.Y.); zhaoyouxing@itbb.org.cn (Y.Z.)

† These authors contributed equally to this work.

**Figure S1-1**  $^1\text{H}$  NMR spectrum of compound **1**

**Figure S1-2**  $^{13}\text{C}$  NMR spectrum of compound **1**

**Figure S1-3** HSQC spectrum of compound **1**

**Figure S1-4**  $^1\text{H}$ - $^1\text{H}$  COSY spectrum of  
compound **1**

**Figure S1-5** HMBC spectrum of compound **1**

**Figure S1-6** ROESY spectrum of compound **1**

**Figure S1-7** HRESIMS Data of compound **1**

**Figure S2-1**  $^1\text{H}$  NMR spectrum of compound **2**

**Figure S2-2**  $^{13}\text{C}$  NMR spectrum of compound **2**

**Figure S2-3** HSQC spectrum of compound **2**

**Figure S2-4**  $^1\text{H}$ - $^1\text{H}$  COSY spectrum of  
compound **2**

**Figure S2-5** HMBC spectrum of compound **2**

**Figure S2-6** ROESY spectrum of compound **2**

**Figure S2-7** HRESIMS Data of compound **2**

**Figure S3-1**  $^1\text{H}$  NMR spectrum of compound **3**

**Figure S3-2**  $^{13}\text{C}$  NMR spectrum of compound **3**

**Figure S3-3** HSQC spectrum of compound **3**

**Figure S3-4**  $^1\text{H}$ - $^1\text{H}$  COSY spectrum of  
compound **3**

**Figure S3-5** HMBC spectrum of compound **3**

**Figure S3-6** ROESY spectrum of compound **3**

**Figure S3-7** HRESIMS Data of compound **3**



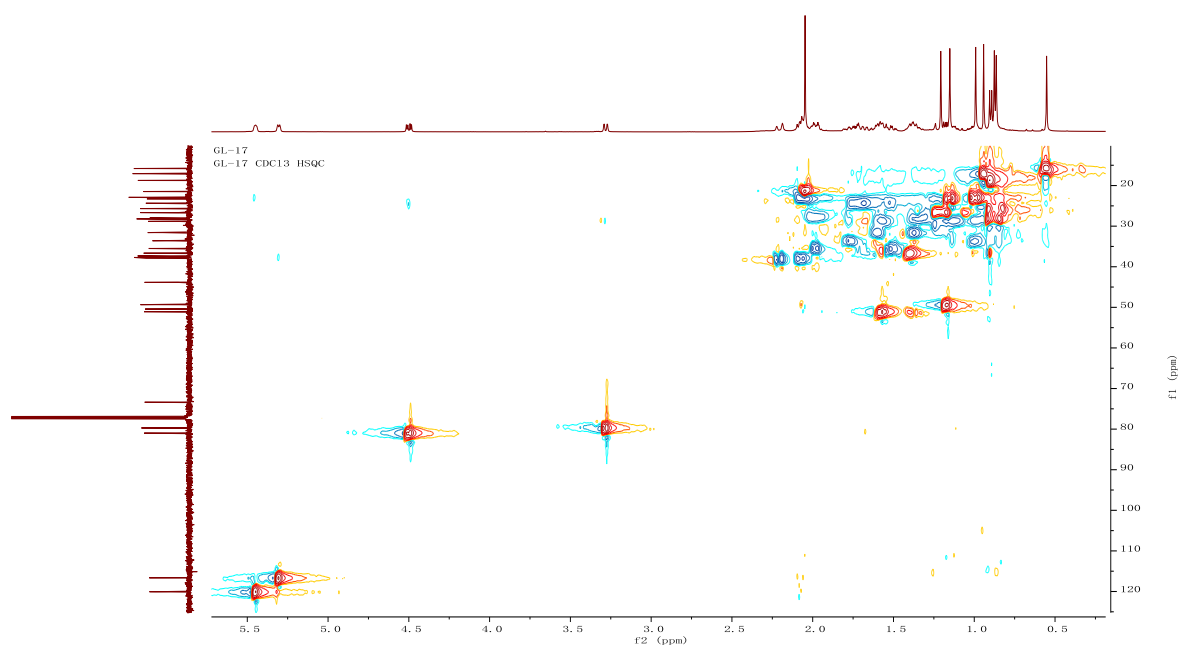

**Figure S1-3 HSQC spectrum of compound 1**

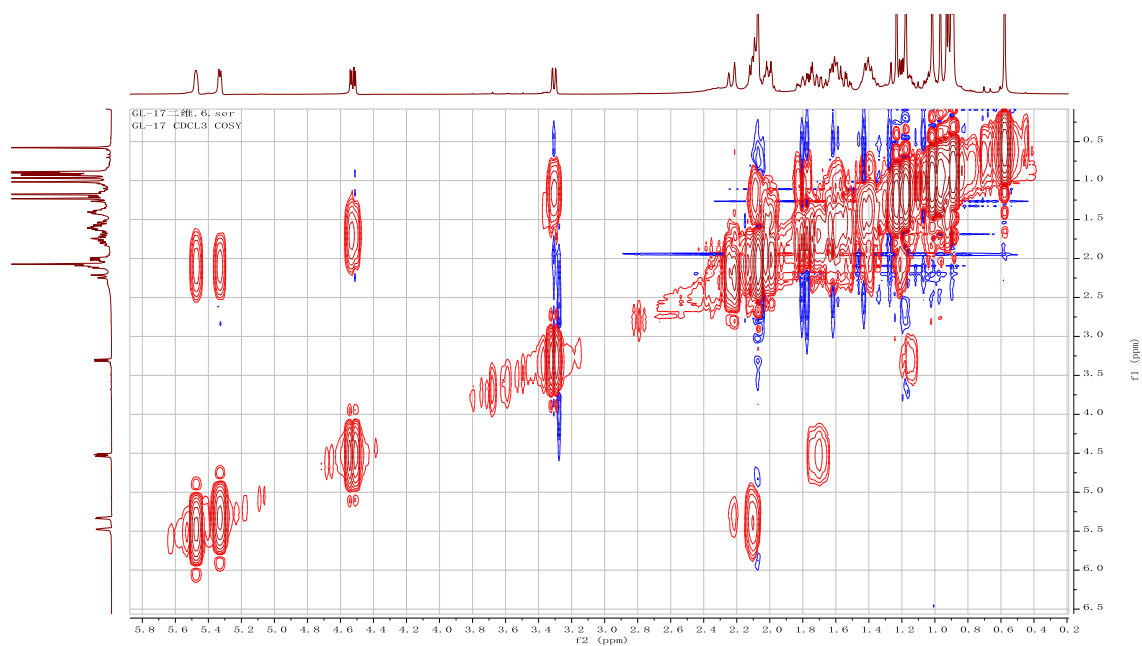

**Figure S1-4 <sup>1</sup>H-<sup>1</sup>H COSY spectrum of compound 1**



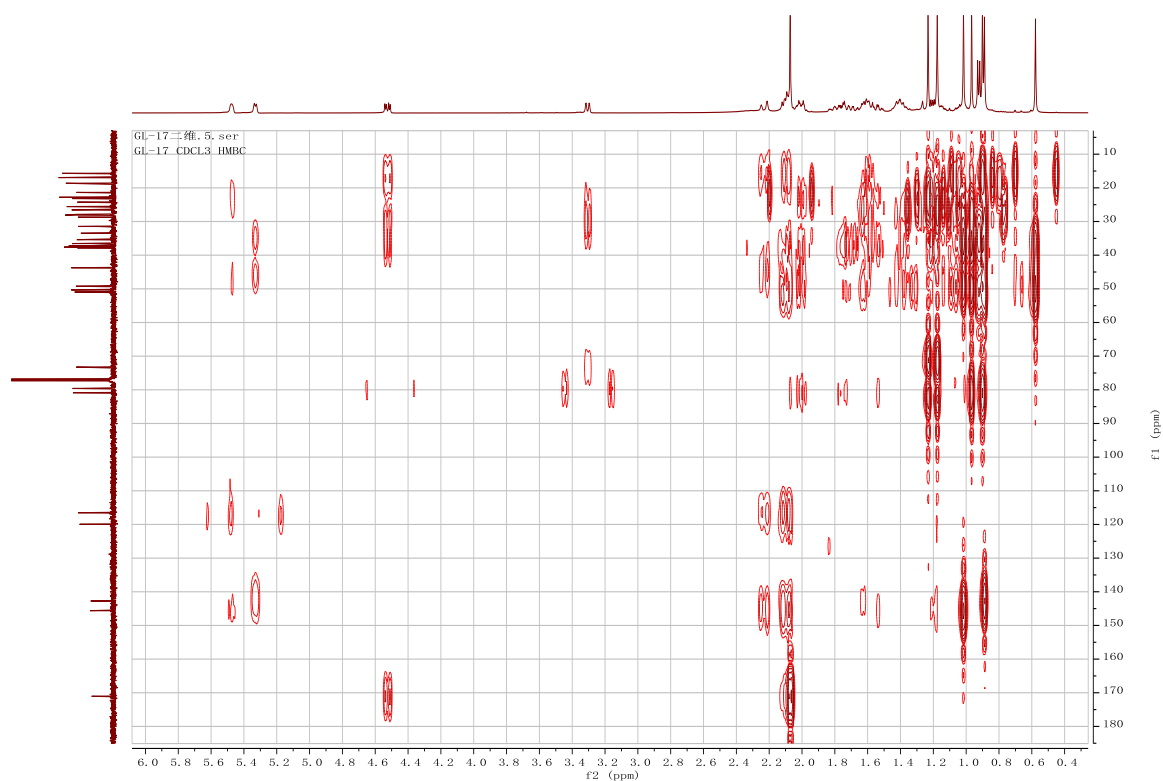

**Figure S1-5** HMBC spectrum of compound **1**

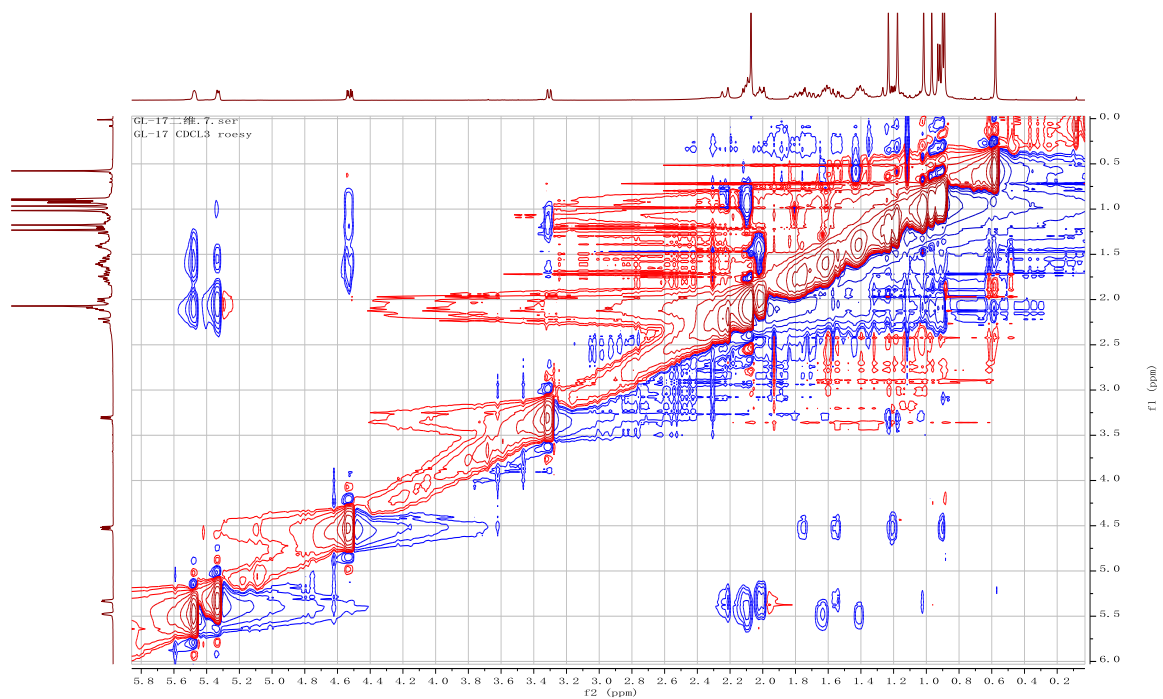

**Figure S1-6** ROESY spectrum of compound **1**

## Qualitative Analysis Report

|                        |                             |               |                       |
|------------------------|-----------------------------|---------------|-----------------------|
| Data Filename          | 150325ESIA3.d               | Sample Name   | GL-17                 |
| Sample Type            | Sample                      | Position      |                       |
| Instrument Name        | Agilent G6230 TOF MS        | User Name     | KIB                   |
| Acq Method             | ESL.m                       | Acquired Time | 3/25/2015 10:54:28 AM |
| IRM Calibration Status | Success                     | DA Method     | ESL.m                 |
| Comment                |                             |               |                       |
| Sample Group           |                             | Info.         |                       |
| Acquisition SW         | 6200 series TOF/6500 series |               |                       |
| Version                | Q-TOF B.05.01 (B5125.2)     |               |                       |

### User Spectra

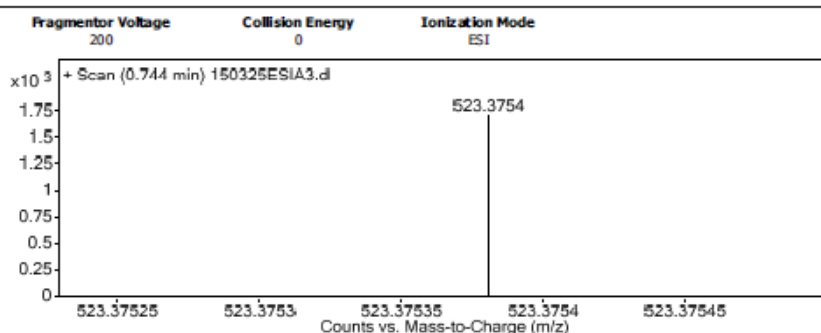

### Peak List

| m/z       | z | Abund     |
|-----------|---|-----------|
| 121.0509  | 1 | 191469.42 |
| 122.0528  | 1 | 12813.9   |
| 262.1798  | 1 | 4608.68   |
| 293.1737  | 1 | 3099.72   |
| 922.0098  | 1 | 315940.16 |
| 923.0118  | 1 | 51887.3   |
| 924.0131  | 1 | 6379.29   |
| 1821.9488 | 1 | 18045.1   |
| 1822.9516 | 1 | 6501.32   |
| 1941.9922 | 1 | 4096.13   |

### Formula Calculator Element Limits

| Element | Min | Max |
|---------|-----|-----|
| C       | 0   | 200 |
| H       | 0   | 400 |
| O       | 0   | 12  |
| Na      | 1   | 1   |

### Formula Calculator Results

| Formula       | CalculatedMass | CalculatedMz | Mz       | Diff. (mDa) | Diff. (ppm) | DBE    |
|---------------|----------------|--------------|----------|-------------|-------------|--------|
| C32 H52 Na O4 | 523.3763       | 523.3758     | 523.3754 | 1.7         | 3.3         | 6.5000 |

--- End Of Report ---

**Figure S1-7 HRESIMS Data of compound 1**



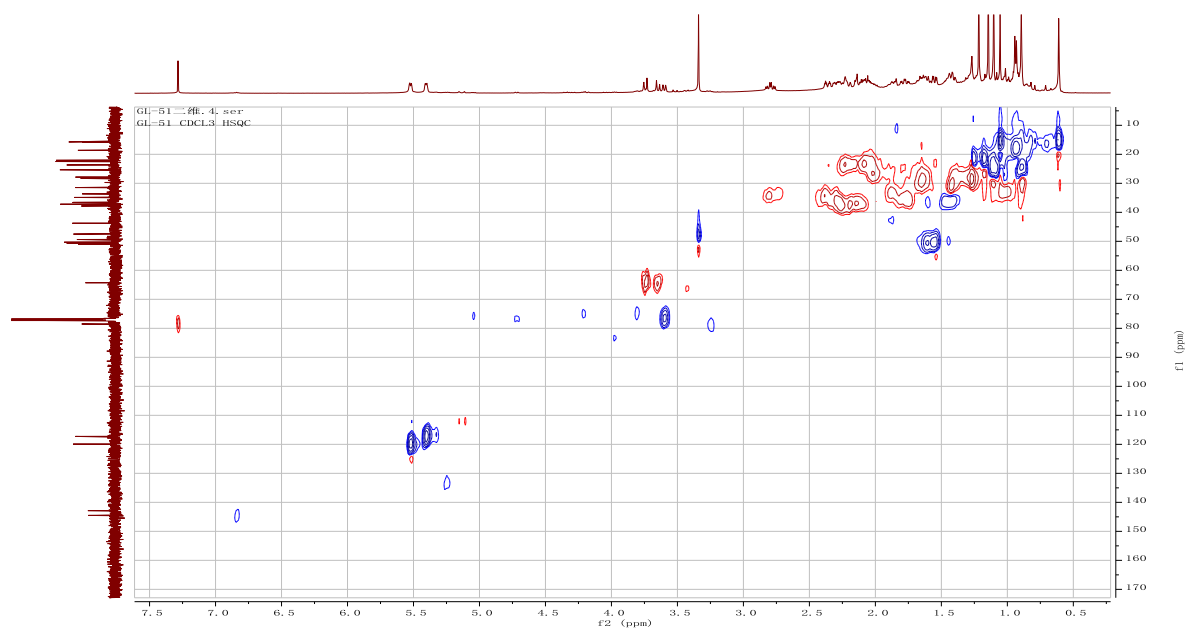

**Figure S2-3** HSQC spectrum of compound **2**

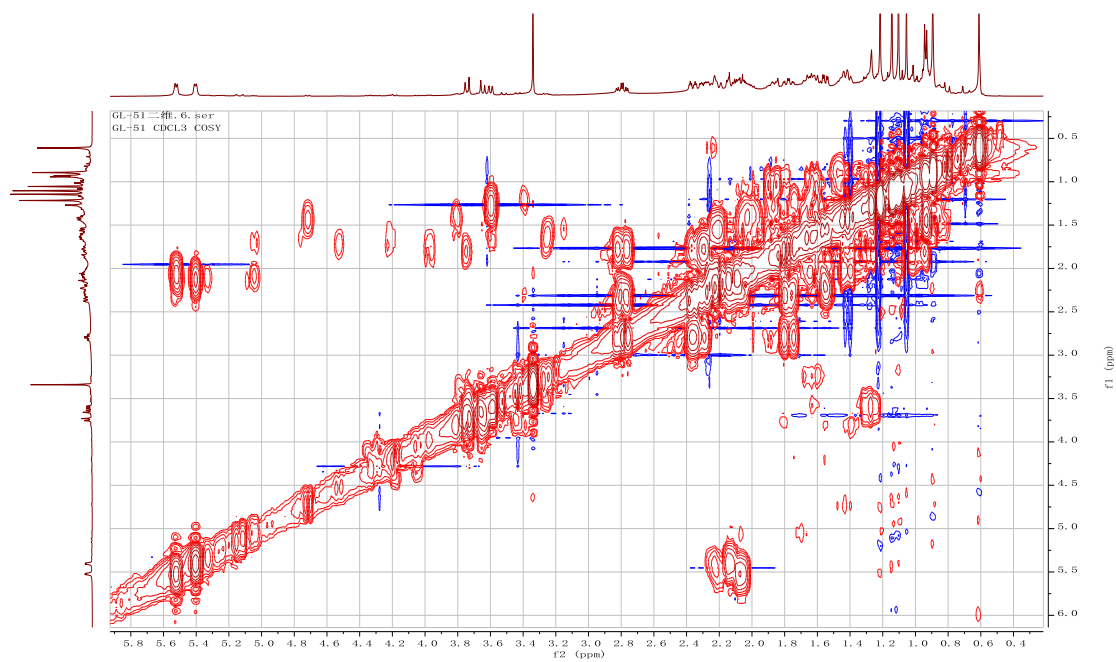

**Figure S2-4**  $^1\text{H}$ - $^1\text{H}$  COSY spectrum of compound **2**

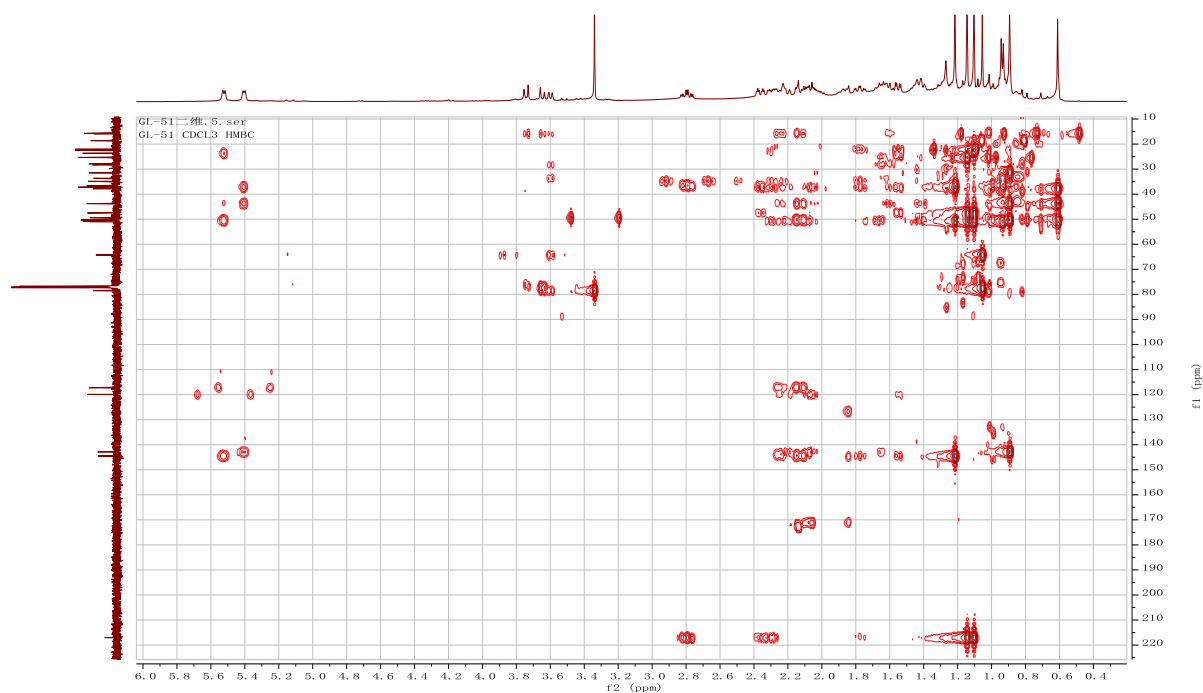

**Figure S2-5** HMBC spectrum of compound **2**

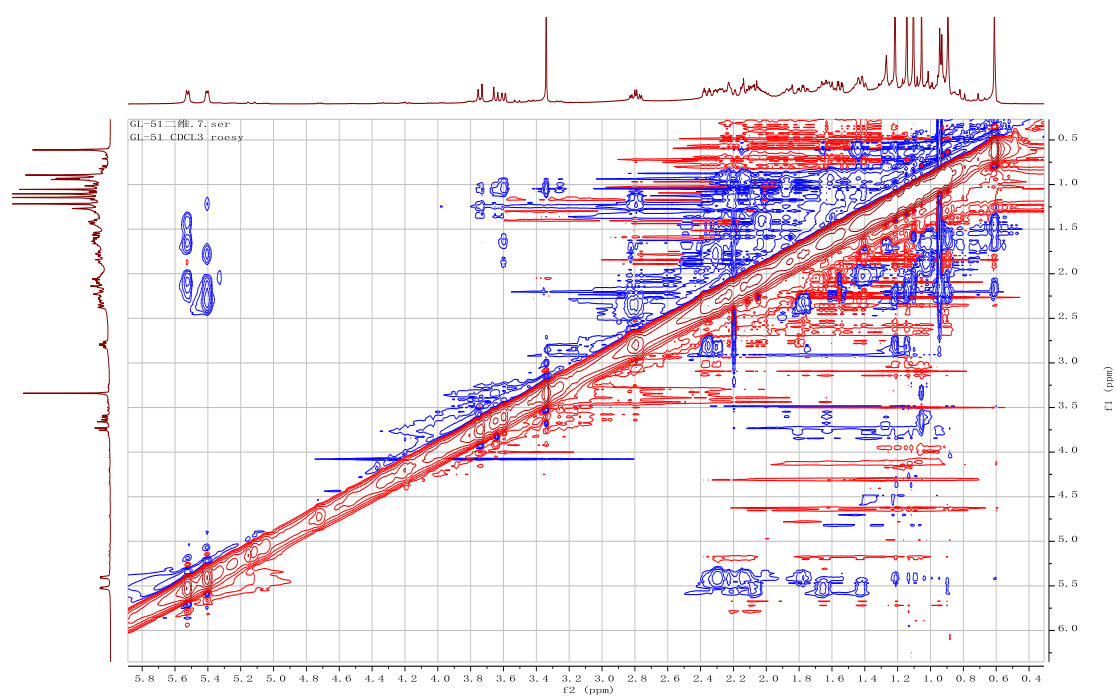

**Figure S2-6** ROESY spectrum of compound **2**

## Qualitative Analysis Report

|                        |                      |               |                     |
|------------------------|----------------------|---------------|---------------------|
| Data Filename          | 150107ESIA7.d        | Sample Name   | GL-51               |
| Sample Type            | Sample               | Position      |                     |
| Instrument Name        | Agilent G6230 TOF MS | User Name     | KIB                 |
| Acq Method             | ESI.m                | Acquired Time | 1/7/2015 8:45:29 AM |
| IRM Calibration Status | Success              | DA Method     | ESI.m               |
| Comment                |                      |               |                     |

|                |                             |       |  |
|----------------|-----------------------------|-------|--|
| Sample Group   |                             | Info. |  |
| Acquisition SW | 6200 series TOF/6500 series |       |  |
| Version        | Q-TOF B.05.01 (B5125.2)     |       |  |

### User Spectra

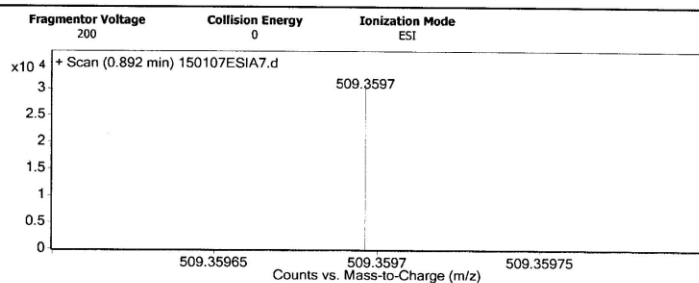

### Peak List

| m/z       | z | Abund    | Formula       | Ion |
|-----------|---|----------|---------------|-----|
| 121.0509  | 1 | 48950.69 |               |     |
| 481.2925  | 1 | 11706.12 |               |     |
| 509.3597  | 1 | 30718.59 | C31 H50 Na O4 | M+  |
| 510.3619  | 1 | 10323.14 | C31 H50 Na O4 | M+  |
| 922.0098  | 1 | 85934.12 |               |     |
| 923.0115  | 1 | 14322.79 |               |     |
| 995.7264  | 1 | 21669.21 |               |     |
| 996.7311  | 1 | 13986.23 |               |     |
| 1023.7229 | 1 | 18231.22 |               |     |
| 1024.7269 | 1 | 11303.9  |               |     |

### Formula Calculator Element Limits

| Element | Min | Max |
|---------|-----|-----|
| C       | 0   | 200 |
| H       | 0   | 400 |
| O       | 0   | 9   |
| Na      | 1   | 1   |

### Formula Calculator Results

| Formula       | CalculatedMass | Mz       | Diff.(mDa) | Diff. (ppm) | DBE |
|---------------|----------------|----------|------------|-------------|-----|
| C31 H50 Na O4 | 509.3607       | 509.3597 | 1.0        | 1.9         | 6.5 |

--- End Of Report ---

Figure S2-7 HRESIMS Data of compound 2

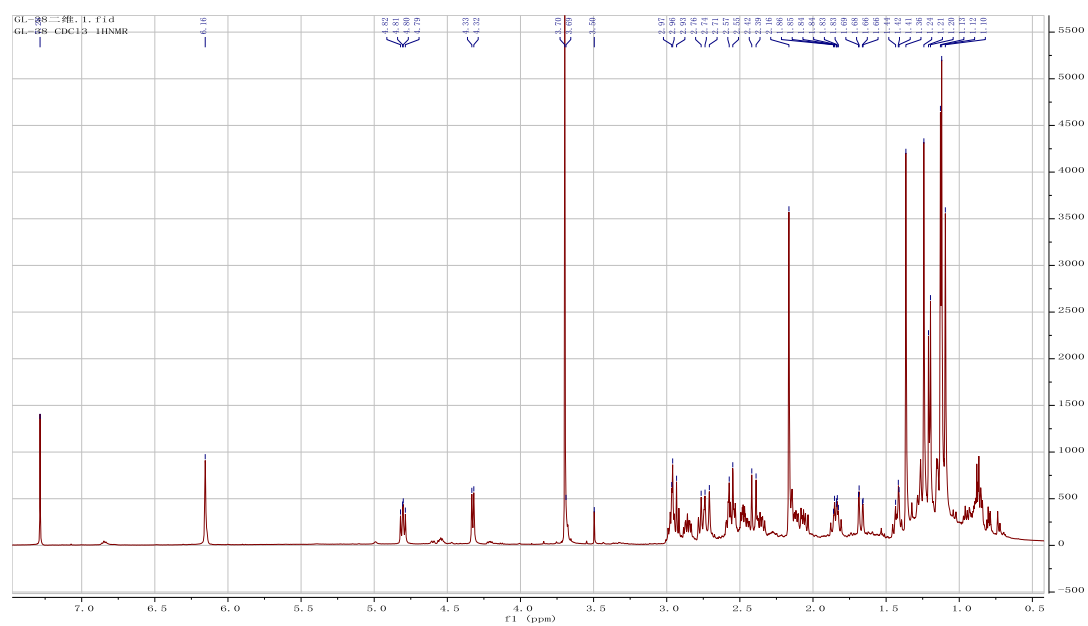

**Figure S3-1**  $^1\text{H}$  NMR spectrum of compound **3**

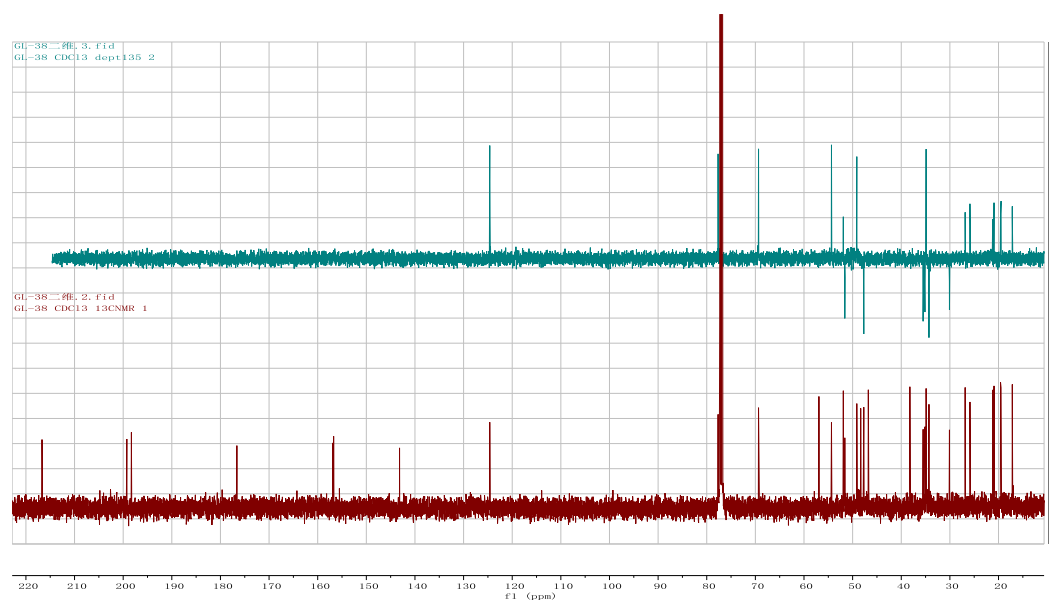

**Figure S3-2**  $^{13}\text{C}$  NMR spectrum of compound **3**

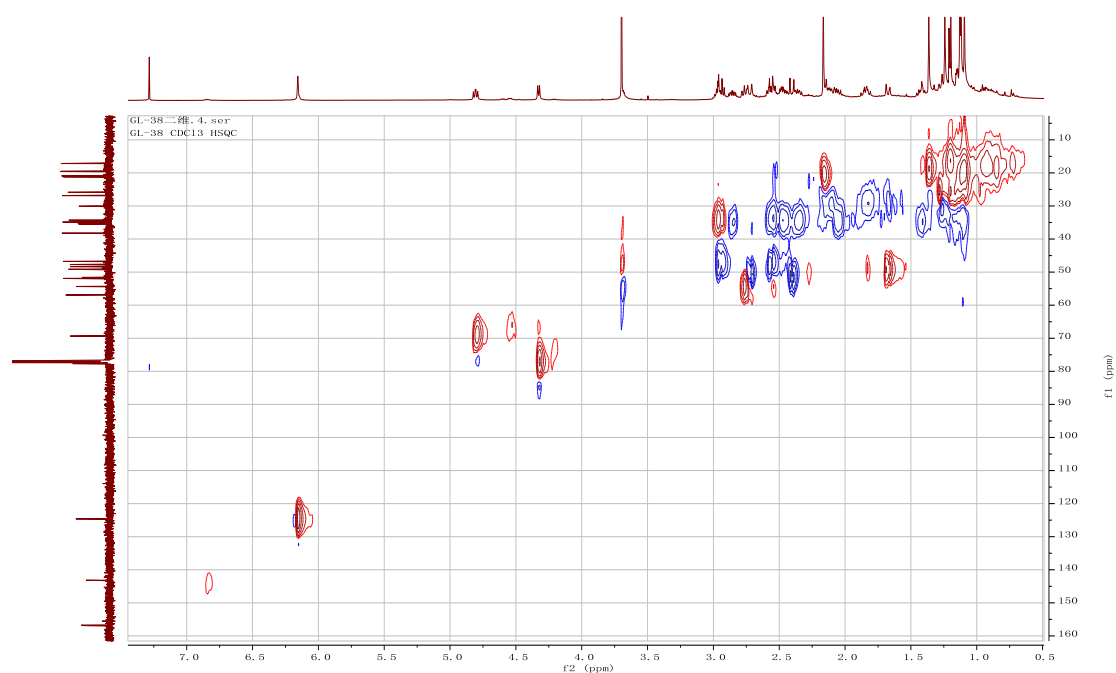

**Figure S3-3** HSQC spectrum of compound **3**

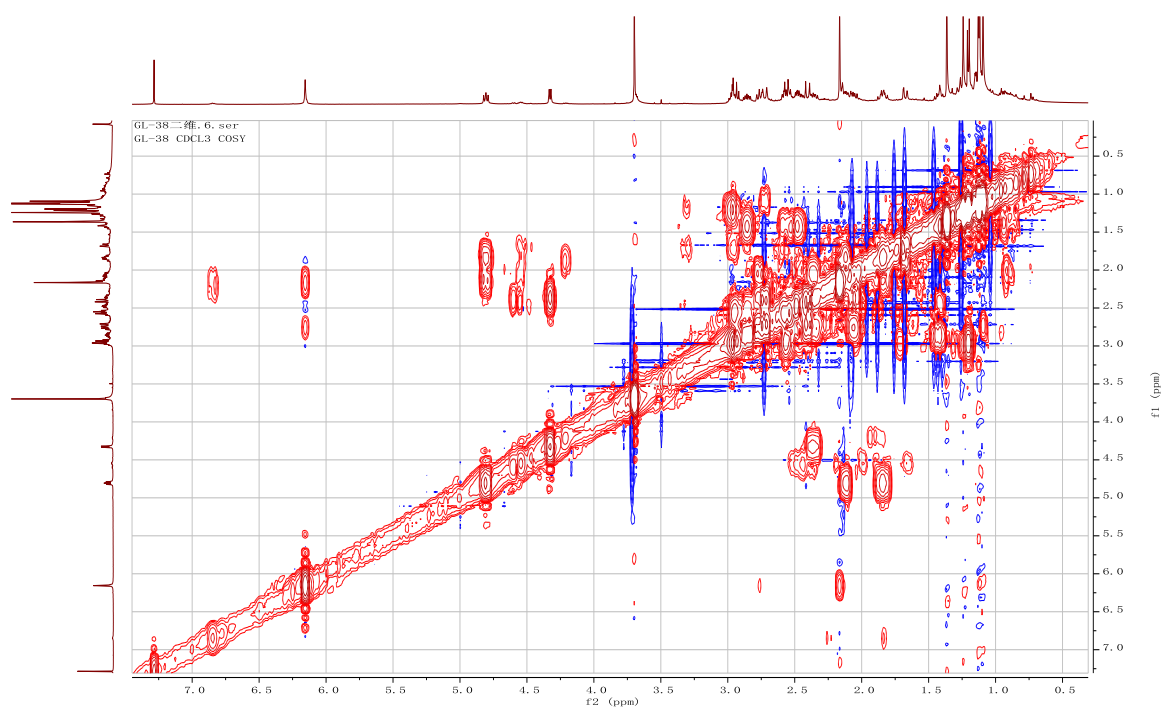

**Figure S3-4**  $^1\text{H}$ - $^1\text{H}$  COSY spectrum of compound **3**



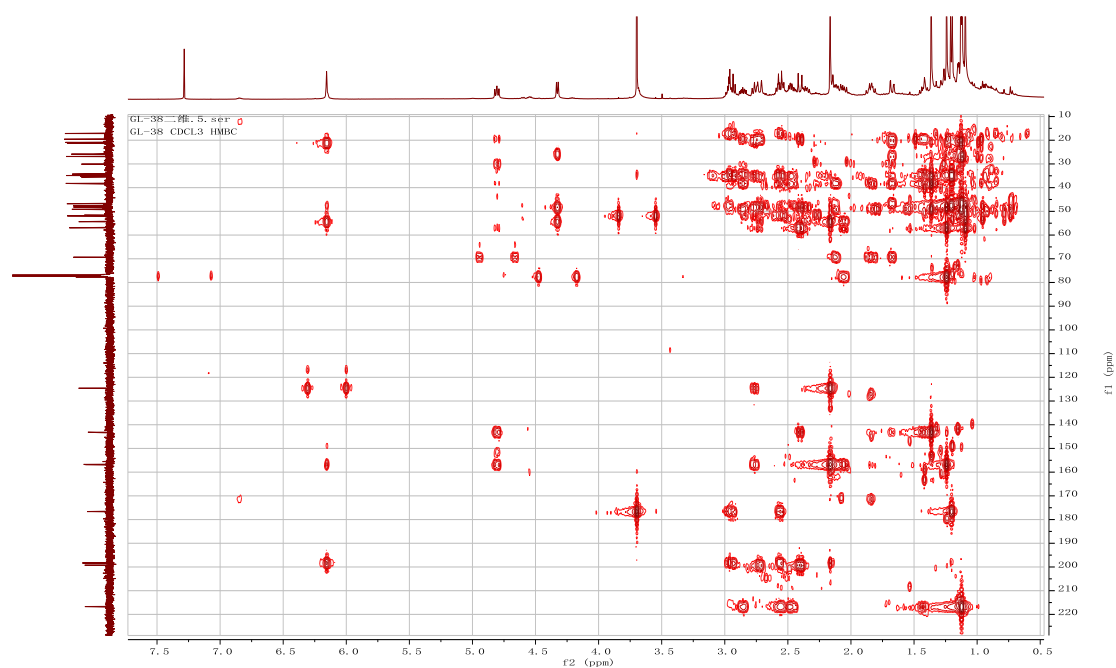

**Figure S3-5** HMBC spectrum of compound **3**

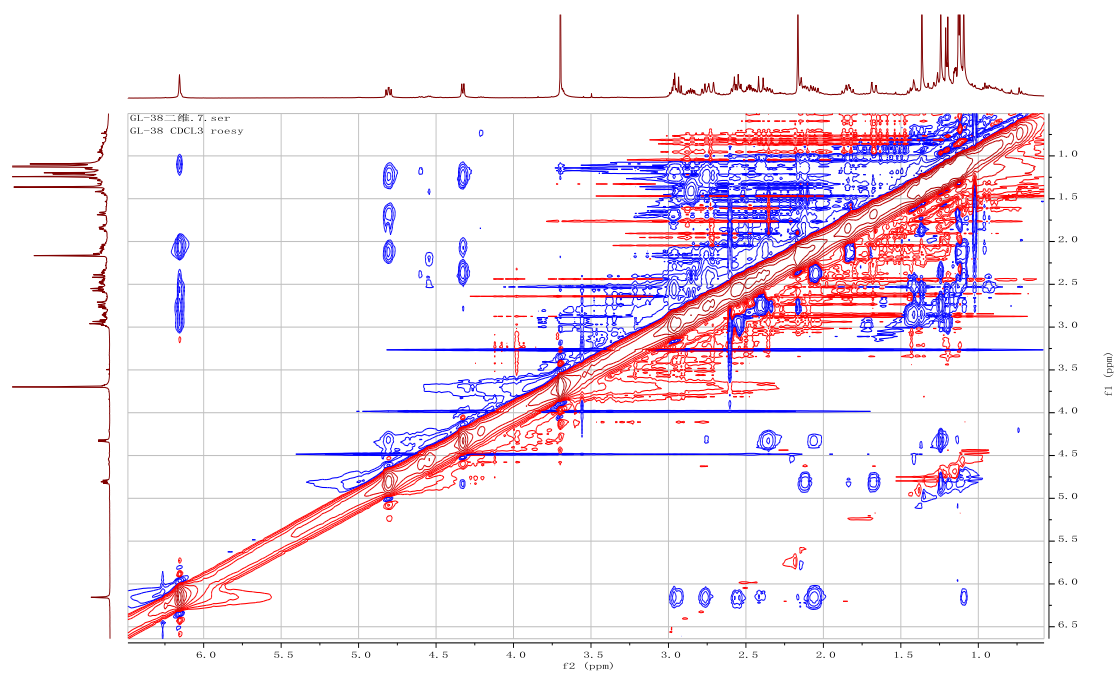

**Figure S3-6** ROESY spectrum of compound **3**

## Qualitative Analysis Report

|                        |                      |               |                     |
|------------------------|----------------------|---------------|---------------------|
| Data Filename          | 150107ESIA6.d        | Sample Name   | GL-38               |
| Sample Type            | Sample               | Position      |                     |
| Instrument Name        | Agilent G6230 TOF MS | User Name     | KIB                 |
| Acq Method             | ESI.m                | Acquired Time | 1/7/2015 8:43:52 AM |
| IRM Calibration Status | Success              | DA Method     | ESI.m               |
| Comment                |                      |               |                     |

|                |                             |       |  |
|----------------|-----------------------------|-------|--|
| Sample Group   |                             | Info. |  |
| Acquisition SW | 6200 series TOF/6500 series |       |  |
| Version        | Q-TOF B.05.01 (B5125.2)     |       |  |

### User Spectra

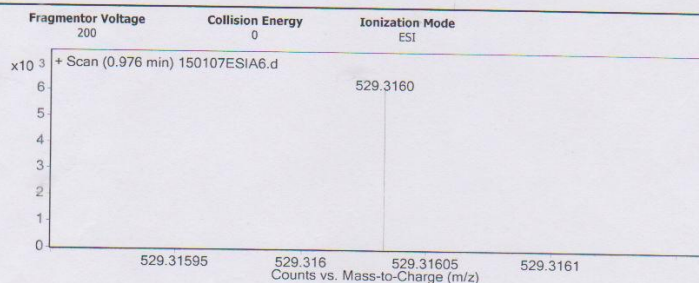

### Peak List

| m/z      | z | Abund    |
|----------|---|----------|
| 121.0509 | 1 | 61042.15 |
| 182.0393 |   | 8911.58  |
| 215.0284 |   | 8792.27  |
| 232.1116 |   | 9777.82  |
| 284.3306 | 1 | 12744.35 |
| 312.3621 |   | 8034.82  |
| 383.1958 | 1 | 10188.46 |
| 551.3002 | 1 | 11822.61 |
| 922.0098 | 1 | 86749.96 |
| 923.0124 | 1 | 13980.35 |

### Formula Calculator Element Limits

| Element | Min | Max |
|---------|-----|-----|
| C       | 0   | 200 |
| H       | 0   | 400 |
| O       | 0   | 9   |

### Formula Calculator Results

| Formula    | CalculatedMass | Mz       | Diff.(mDa) | Diff. (ppm) | DBE |
|------------|----------------|----------|------------|-------------|-----|
| C31 H45 O7 | 529.3165       | 529.3160 | 0.5        | 1.0         | 9.5 |

--- End Of Report ---

**Figure S3-7 HRESIMS Data of compound 3**
